# Supplementary material for: Unique DNA methylome profiles in CpG island methylator phenotype colon cancers
Source: HighWire-hosted journal article supplement (doi:10.1101/gr.122788.111), 2011-10-11
Supplement: Supplementary_Table_2_and_6.pdf [file Supplementary_Table_2_and_6.pdf]

**Supplementary Table 2. Summary of enrichment analysis of genomic features**

| Dataset*                   | Total No. windows | No. feature windows | Empirical frequency | p-value**                |
|----------------------------|-------------------|---------------------|---------------------|--------------------------|
| <b>CpG islands</b>         |                   |                     |                     |                          |
| Hg18                       | 60,614,574        | 486,744             | 0.008               |                          |
| Colon cancer data          |                   |                     |                     |                          |
| P001                       | 26,133            | 19,119              | 0.732               | $<2.23 \times 10^{-308}$ |
| P010                       | 470               | 226                 | 0.481               | $<2.23 \times 10^{-308}$ |
| P011                       | 56,819            | 40,753              | 0.717               | $<2.23 \times 10^{-308}$ |
| P110                       | 377               | 36                  | 0.096               | $5.09 \times 10^{-81}$   |
| P101                       | 103               | 64                  | 0.621               | $<2.23 \times 10^{-308}$ |
| P100                       | 873               | 61                  | 0.070               | $1.85 \times 10^{-93}$   |
| <b>CTCF binding sites</b>  |                   |                     |                     |                          |
| Hg18                       | 60,614,574        | 2,177,551           | 0.036               |                          |
| Colon cancer data          |                   |                     |                     |                          |
| P001                       | 26,133            | 7,626               | 0.292               | $<2.23 \times 10^{-308}$ |
| P010                       | 470               | 92                  | 0.196               | $1.15 \times 10^{-77}$   |
| P011                       | 56,819            | 9,264               | 0.163               | $<2.23 \times 10^{-308}$ |
| P110                       | 377               | 44                  | 0.117               | $1.75 \times 10^{-17}$   |
| P101                       | 103               | 7                   | 0.068               | $4.03 \times 10^{-2}$    |
| P100                       | 873               | 84                  | 0.096               | $5.20 \times 10^{-22}$   |
| <b>Repetitive elements</b> |                   |                     |                     |                          |
| Hg18                       | 60,614,574        | 38,192,602          | 0.630               |                          |
| Colon cancer data          |                   |                     |                     |                          |
| P001                       | 26,133            | 3,533               | 0.135               | 1                        |
| P010                       | 470               | 64                  | 0.136               | 1                        |
| P011                       | 56,819            | 5,918               | 0.104               | 1                        |
| P110                       | 377               | 105                 | 0.279               | 1                        |
| P101                       | 103               | 27                  | 0.262               | 1                        |
| P100                       | 873               | 384                 | 0.440               | 1                        |

\*The colon cancer data is categorized by differential methylation patterns; Hypermethylated in CIMP only (P001), Hypermethylated in non-CIMP only (P010), Hypermethylated in all tumors (P011), Hypomethylated in CIMP only (P110), Hypomethylated in non-CIMP only (P101), and Hypomethylated in all tumors (P100).

\*\*P values were obtained by testing the hypothesis that the frequency of genomic features in the colon cancer dataset was greater than the genome average for the same feature.

**Supplementary Table 6. Clinical details of tumor samples**

| Sample | MSI      | <i>BRAF</i> | <i>KRAS</i> | CIMP markers | Stage | Site     | Differentiation |
|--------|----------|-------------|-------------|--------------|-------|----------|-----------------|
| T1     | Stable   | WT          | MUT         | 0/5          | 4     | Distal   | Poor            |
| T2     | Stable   | WT          | MUT         | 0/5          | 3     | Distal   | Moderate        |
| T3     | Stable   | WT          | MUT         | 0/5          | 2     | Distal   | Moderate        |
| T4     | Unstable | MUT         | WT          | 5/5          | 2     | Proximal | Moderate        |
| T5     | Unstable | MUT         | WT          | 5/5          | 2     | Proximal | Moderate        |
| T6     | Unstable | MUT         | WT          | 5/5          | 2     | Proximal | Moderate        |
